# Supplementary material for: A Förster Resonance Energy Transfer (FRET)-based System Provides Insight into the Ordered Assembly of Yeast Septin Hetero-octamers
Source: PubMed Central journal article supplement (PMC4653696; doi:10.1074/jbc.m115.683128), 2015-09-28
Supplement: 10.1074_M115.683128_jbc.M115.683128-1.pdf [file 10.1074_M115.683128_jbc.M115.683128-1.pdf]

## SUPPLEMENTAL INFORMATION

### A FRET-based System Provides Insight into the Ordered Assembly of Yeast Septin Hetero-octamers

Elizabeth A. Booth<sup>1a</sup>, Eleanor W. Vane<sup>1b</sup>, Dustin Dovala<sup>2c</sup> and Jeremy Thorner<sup>1\*</sup>

<sup>1</sup>Division of Biochemistry, Biophysics, and Structural Biology, Department of Molecular and Cell Biology, University of California, Berkeley, CA 94720-3202

<sup>2</sup>Program in Microbial Pathogenesis and Host Defense, Department of Microbiology and Immunology, University of California School of Medicine, San Francisco, CA 94158-2200

Running title: *A spectroscopic approach for analysis of septin assembly*

\*To whom correspondence should be addressed: Prof. Jeremy Thorner, Dept. of Molecular and Cell Biology, University of California, Rm. 526, Barker Hall, Berkeley, CA 94720-3202. Phone: (510) 642-2558, FAX: (510) 642-6420, E-mail: [jthorner@berkeley.edu](mailto:jthorner@berkeley.edu)

Shs1 AF555

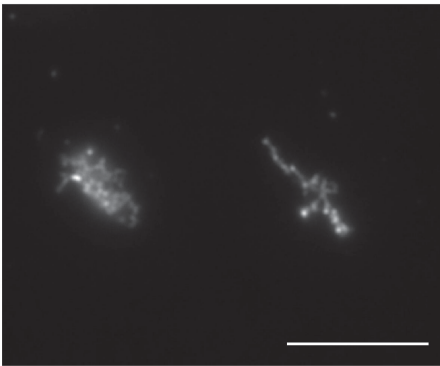

Shs1 ΔCTE AF555

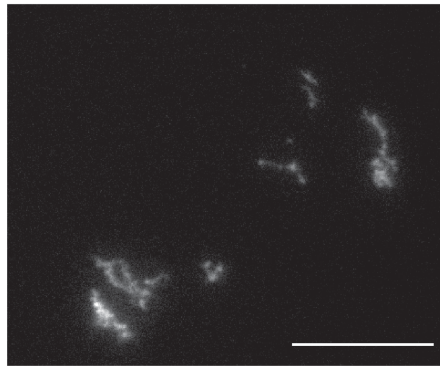

Shs1 Δα0 AF555

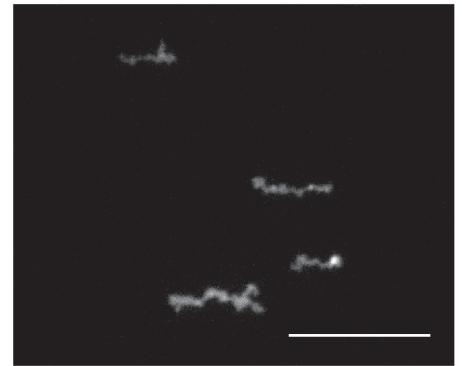

**Figure S1:** Micrographs of assembled Shs1 septins. Shs1<sup>AF555</sup> constructs self-assembled for 1 hour at room temperature before plating on PLL coated slides.

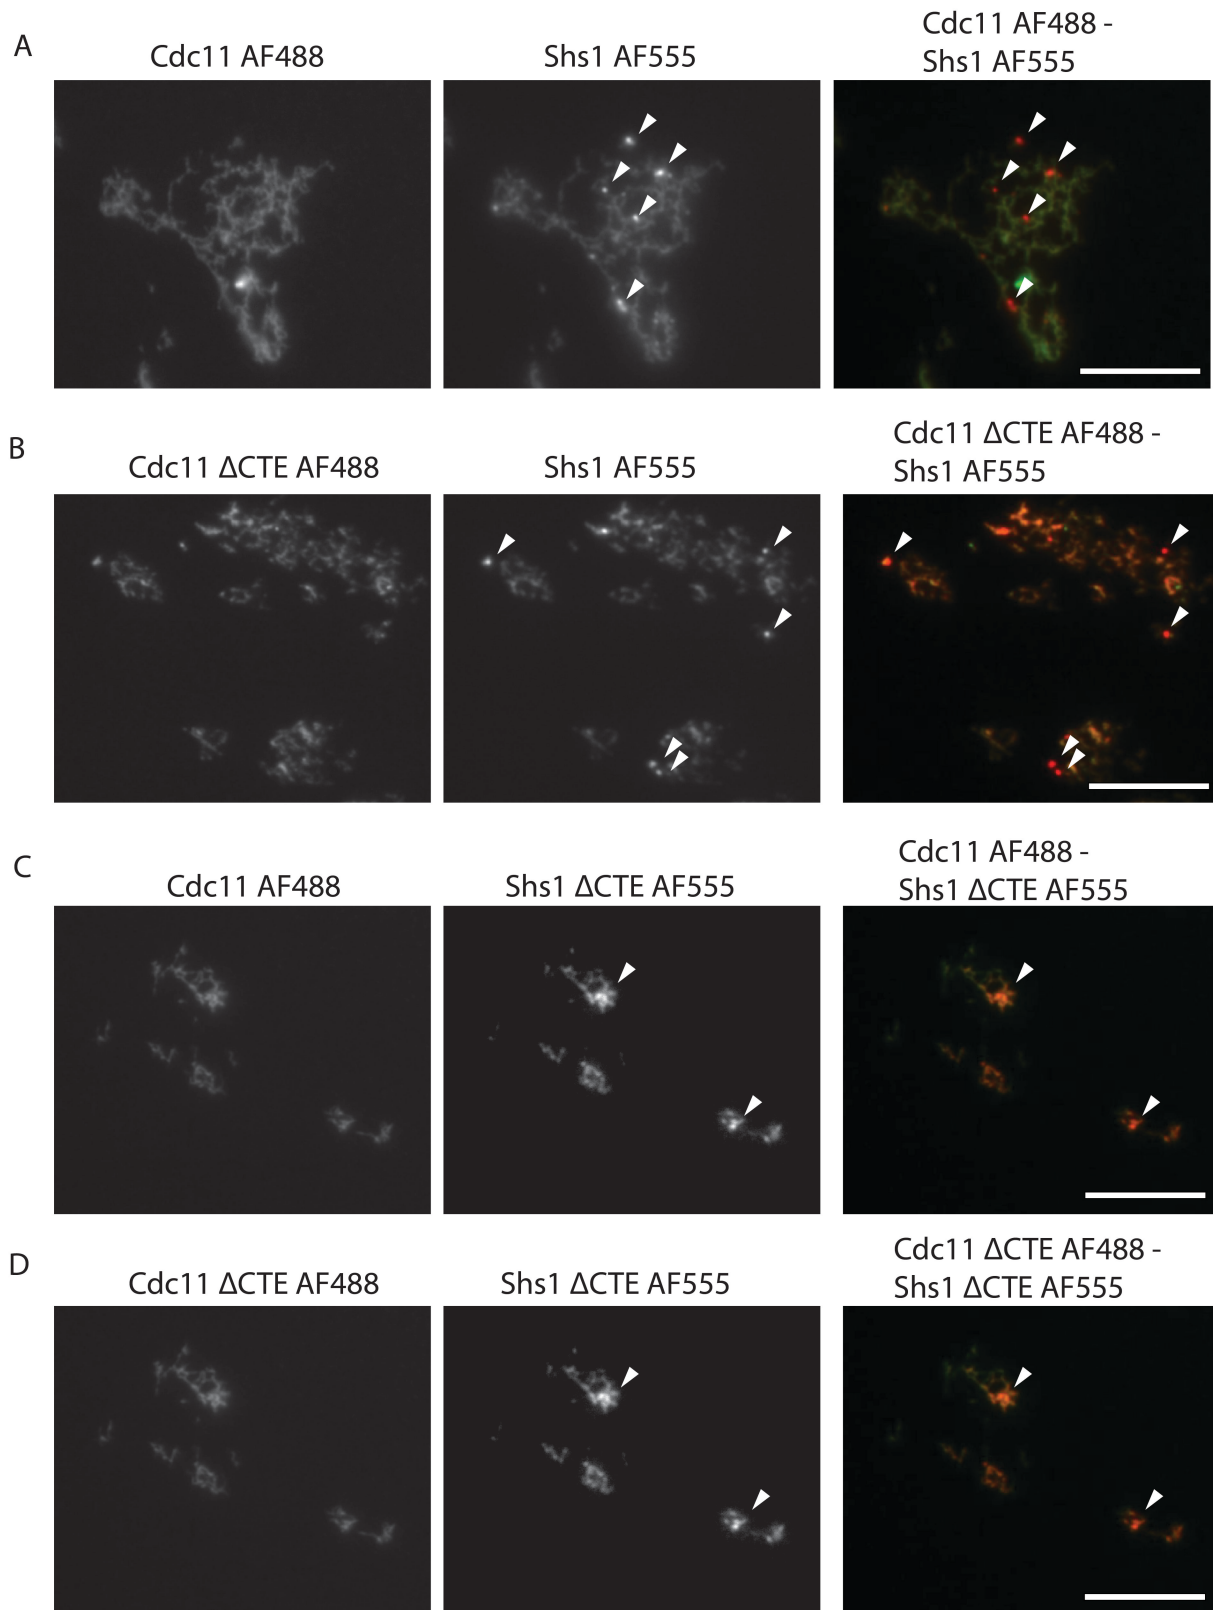

**Figure S2:** Micrographs of assembled Cdc11 and Shs1 septins with CTE deletions. Equimolar concentrations for Cdc11<sup>AF488</sup> septins and Shs1<sup>AF555</sup> septins self-assembled for 1 hour at room temperature before plating on PLL coated slides. (A-D) Leftmost column shows the Cdc11<sup>AF488</sup> construct. The center column shows the Shs1<sup>AF555</sup> construct. The rightmost column shows the overlay of the AF555 and AF488 labeled constructs. Arrows indicate the formation of Shs1 puncta.

*A spectroscopic approach for analysis of septin assembly*

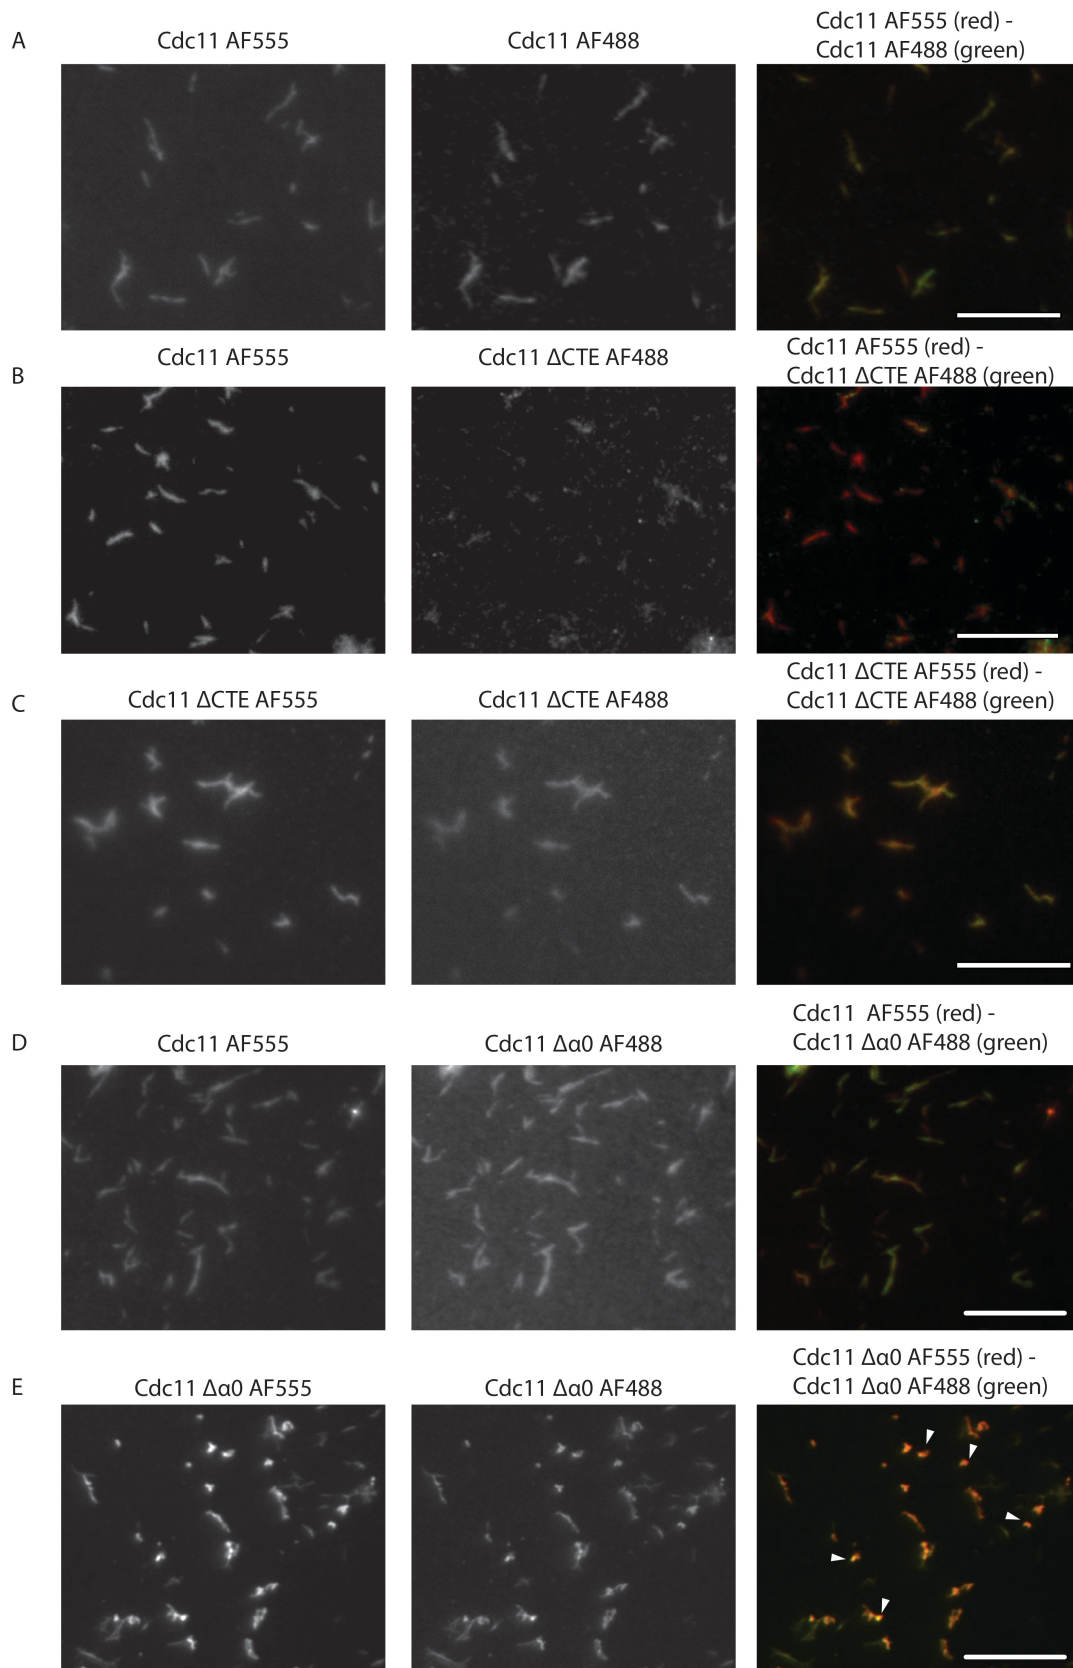

**Figure S3:** Micrographs of assembled Cdc11 septins. Equimolar concentrations for AF488 and AF555 labeled septins self-assembled for 1 hour at room temperature before plating on PLL coated slides. (A-E) Leftmost column shows the Cdc11<sup>AF555</sup> construct. The center column shows the Cdc11<sup>AF488</sup> construct. The rightmost column shows the overlay of the AF555 and AF488 labeled constructs.

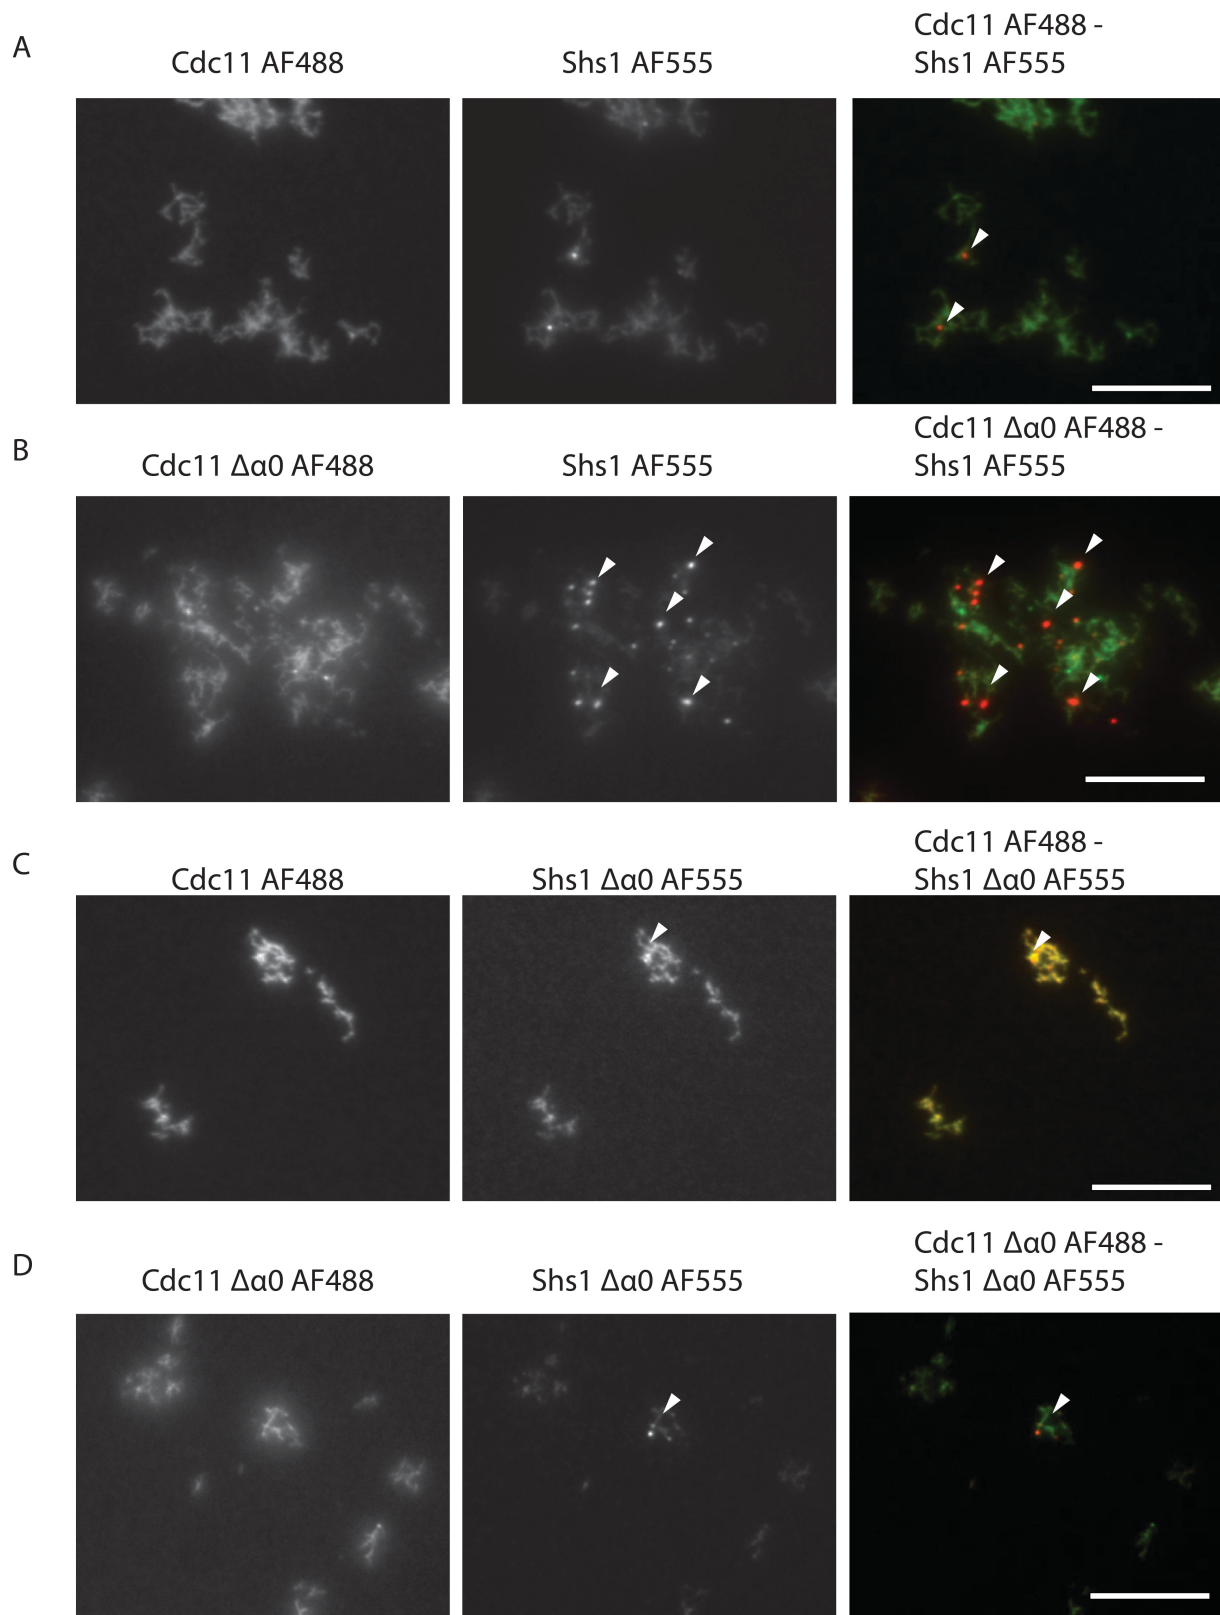

**Figure S4:** Micrographs of assembled Cdc11 and Shs1 septins with  $\alpha 0$  deletions. Equimolar concentrations for Cdc11<sup>AF488</sup> septins and Shs1<sup>AF555</sup> septins self-assembled for 1 hour at room temperature before plating on PLL coated slides. (A-D) Leftmost column shows the Cdc11<sup>AF488</sup> construct. The center column shows the Shs1<sup>AF555</sup> construct. The rightmost column shows the overlay of the AF555 and AF488 labeled constructs. Arrows indicate the formation of Shs1 puncta.
